# Supplementary material for: The link between executive skills and neural dynamics during encoding, inhibition, and retrieval of visual information in the elderly
Source: PubMed Central journal article supplement — Hum Brain Mapp. 2024 Aug 26;45(12):e26755. doi: 10.1002/hbm.26755 (PMC11345698; doi:10.1002/hbm.26755), 2024-08-26

## Frequency-sensitive TFR analysis

alpha = 0.05

### A Encoding and Maintenance (First vs. second fixation)

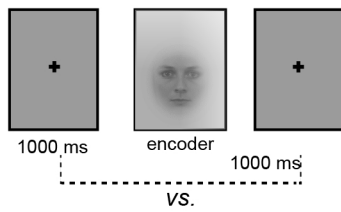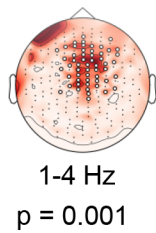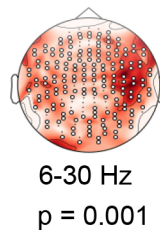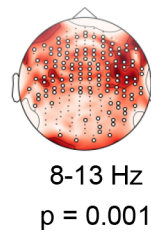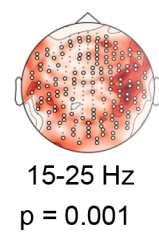

### B General Inhibition (Second vs. third fixation)

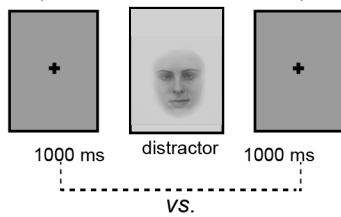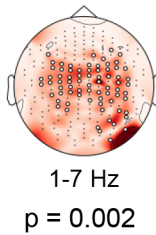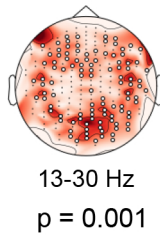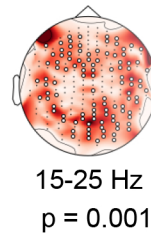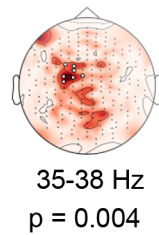

### C Level of Inhibition (Within third fixation)

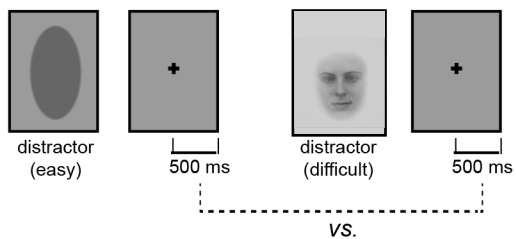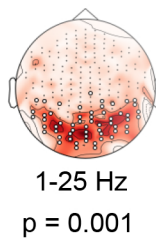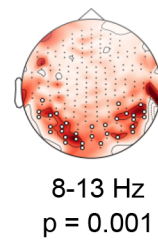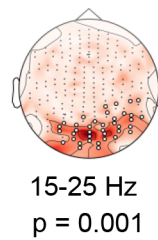

Supplement: HBM-45-e26755-s001.pdf [file HBM-45-e26755-s001.pdf]
